# Supplementary material
Source: Springer Nature journal article supplement (https://www.springermedizin.de/resource/supplementary/12889_2008_1437_MOESM5_ESM.pdf/9503866)

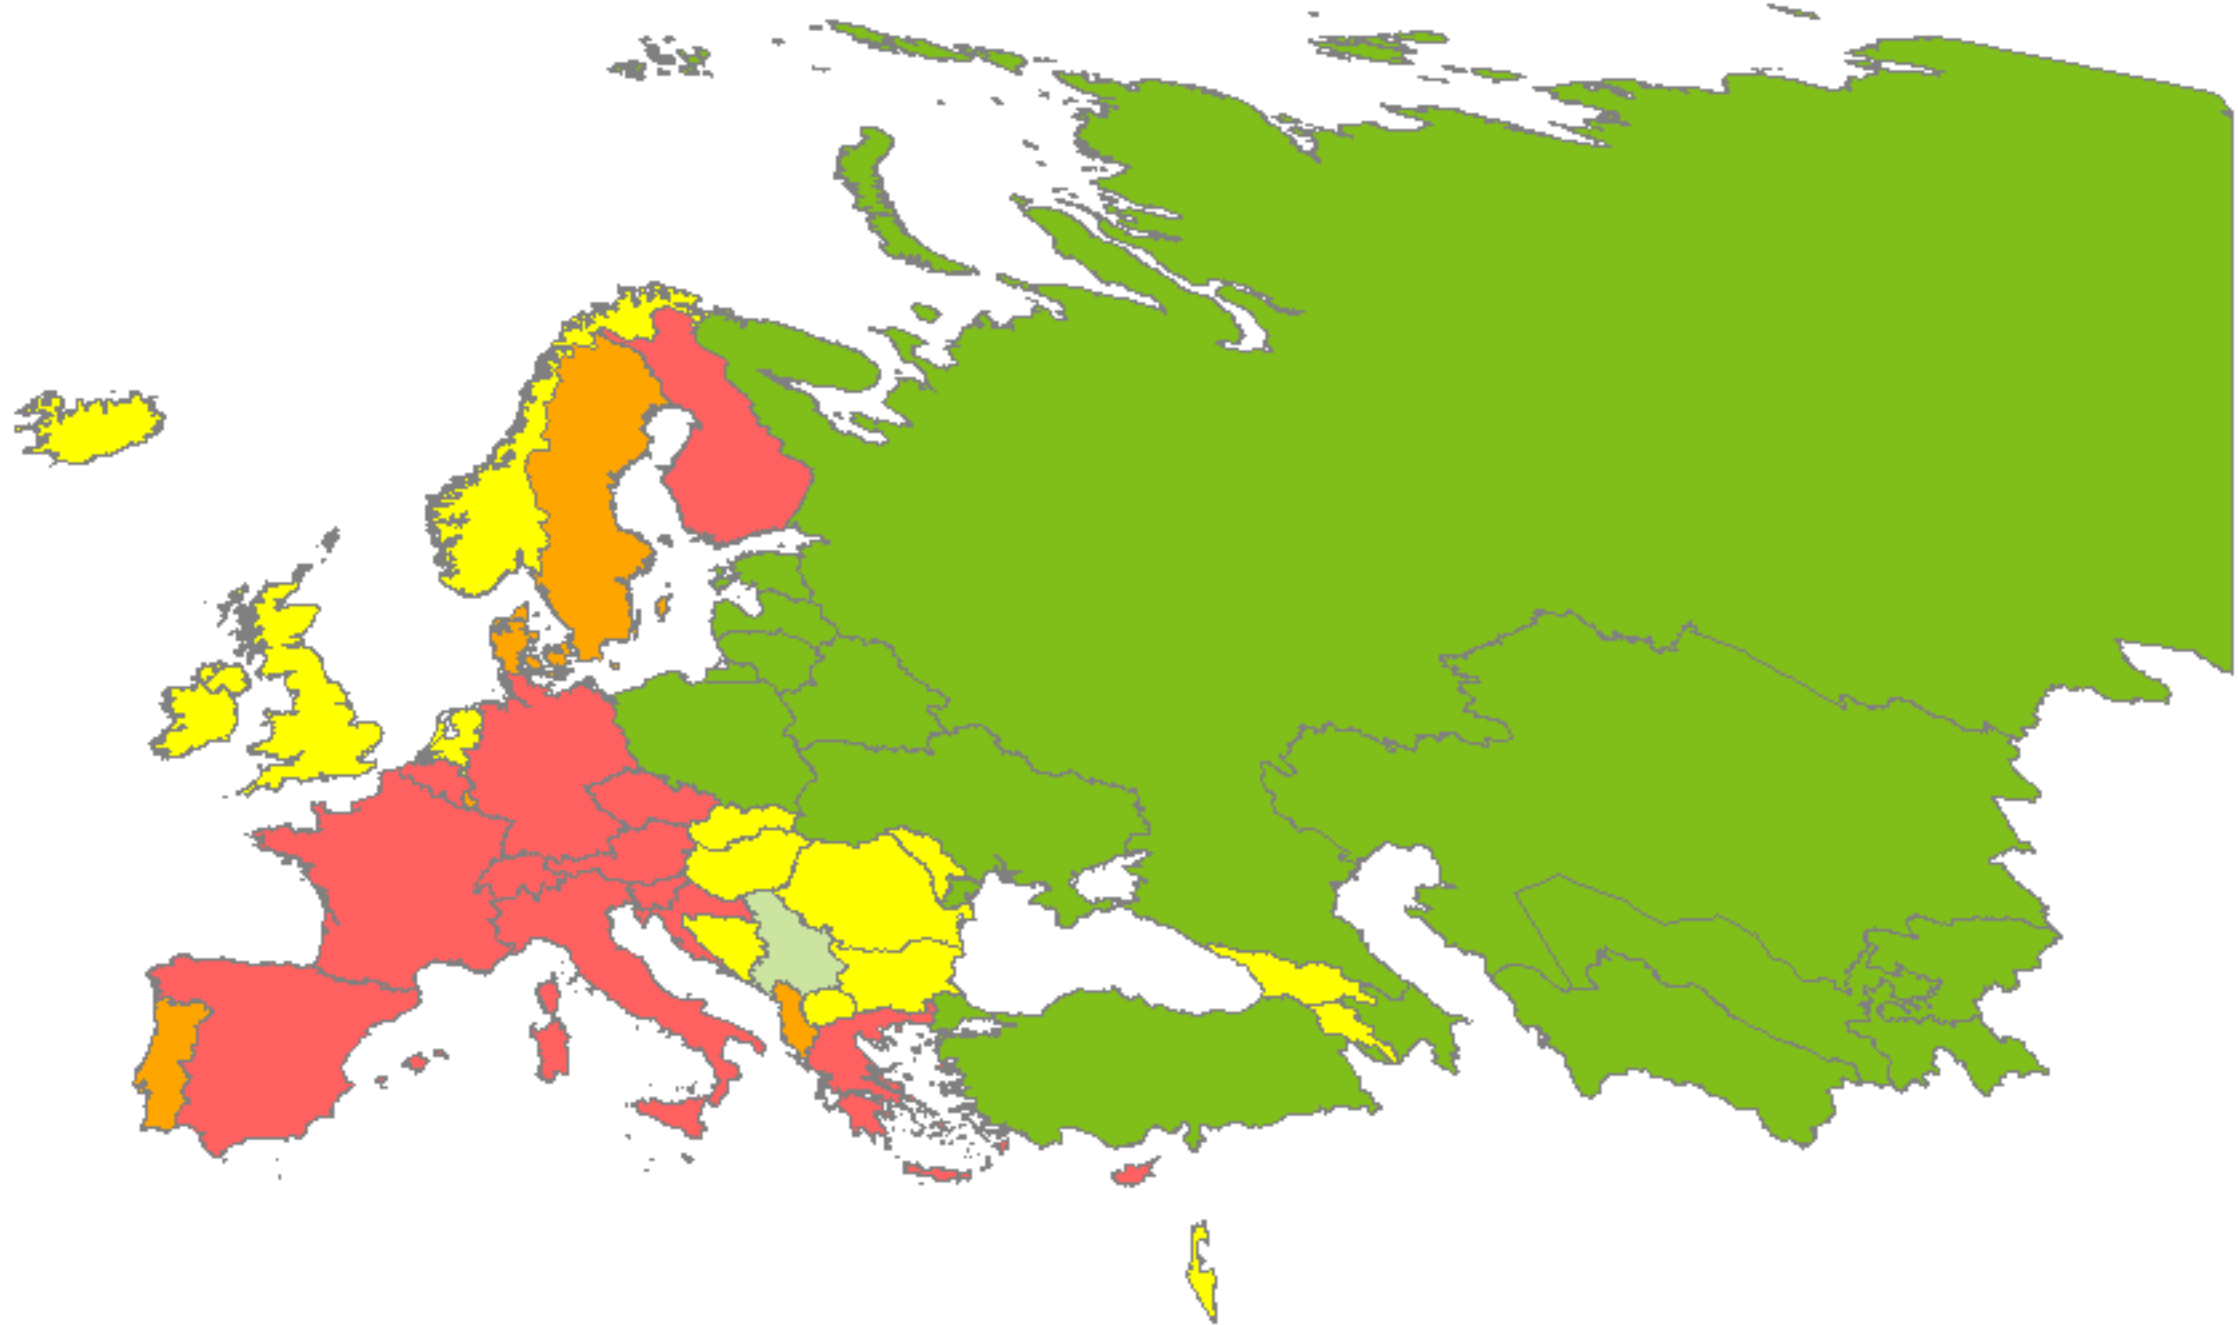

Death Rate HCV Liver Cancer  
(Deaths per 100 000):

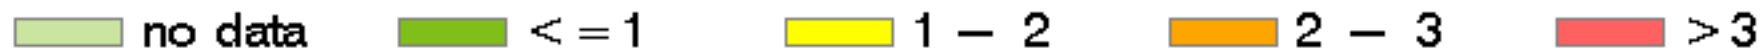

Supplement: MOESM5 [file 9503866]
